# Supplementary material for: GFAPδ/GFAPα ratio directs astrocytoma gene expression towards a more malignant profile
Source: PubMed Central journal article supplement (PMC5675697; doi:10.18632/oncotarget.21540), 2017-10-04
Supplement: oncotarget-08-88104-s001.pdf [file oncotarget-08-88104-s001.pdf]

## GFAP $\delta$ /GFAP $\alpha$ ratio directs astrocytoma gene expression towards a more malignant profile

### SUPPLEMENTARY MATERIALS

#### Real time quantitative PCR

After treating 500 ng RNA with DNase for 2 min at 42°C (gDNA wipeout buffer), cDNA was made in 10  $\mu$ l reactions using Quantiscript<sup>®</sup> Reverse Transcriptase with a mix of oligo-dT and random primers at 42°C for 30 min. The reaction was stopped by an inactivation step at 95°C for 3 min (Quantitect; Qiagen Benelux B.V., Venlo, NL).

The produced cDNA was diluted 20x in MilliQ and was used as a template in the real time qPCR in 96-wells plates and the reaction was analysed with an ABI7300 (Applied Biosystems, Life Technologies, Bleiswijk, NL). The reaction mix consisted of 1  $\mu$ l template, 3.5  $\mu$ l MilliQ, 0.5  $\mu$ l primer mix (final concentration of 0.1  $\mu$ M for each primer), and 5  $\mu$ l SYBR<sup>®</sup> Green PCR Master Mix (Applied Biosystems, Life Technologies, Bleiswijk, NL). The qPCR program consisted of an incubation of 2 min at 50°C and 10 min at 95°C, followed by 40 cycles of 15 seconds at 95°C and 1 min at 60°C. After the qPCR reaction, a dissociation curve was made by ramping the temperature from 60°C to 95°C. Curve analysis was performed using the Sequence Detection Software version 1.4 (Applied Biosystems), with a standard threshold of 0.2 (determined to be in the log linear part of the derived curve), and an automatic determination and correction of baseline fluorescence. Primers were designed to target intron-spanning exons (when possible) of the transcripts of interest and to generate 50-125 bp long amplicons. Primer efficiencies and dissociation curves were verified

using a 1:20-1:320 dilution series of U251-MG cDNA and the amplicon product size was verified by agarose gel electrophoresis. Specifications of primers are given in Supplementary Table 1. A set of 3 reference genes was identified based on the microarray analysis (PPP3CB, CNOT10, CLNS1A), of which the geometric mean was used to normalize the data.

#### Immunocytochemistry

For immunocytochemical stainings, cells were fixed in 4% (w/v) paraformaldehyde (4% PFA) dissolved in phosphate buffered saline, pH 7.4 (PBS) for 15 min. Cells were washed with PBS and incubated overnight at 4°C with the primary antibody diluted in blocking buffer (50 mM Tris pH 7.4, 150 mM NaCl, 0.25% (w/v) gelatine, and 0.5% triton X-100). Cells were then washed three times with PBS and incubated with the secondary antibodies and the nuclear counterstain Hoechst 33258, diluted in blocking buffer, at room temperature for 1 hour. Cells were then washed three times with PBS, dipped in MilliQ and mounted with Mowiol (0.1 M tris-Hcl pH 8.5, 25% glycerol, 10% Mowiol (Calbiochem, Merck Millipore, Darmstadt, Germany)). Micrographs from the fluorescent stainings were taken with a Leica epifluorescent DMRD microscope. The antibody used was polyclonal anti-GFAP (1:2000; DAKO, #Z0334) and the nuclei were counterstained with Hoechst 33258 (1:1000; invitrogen).

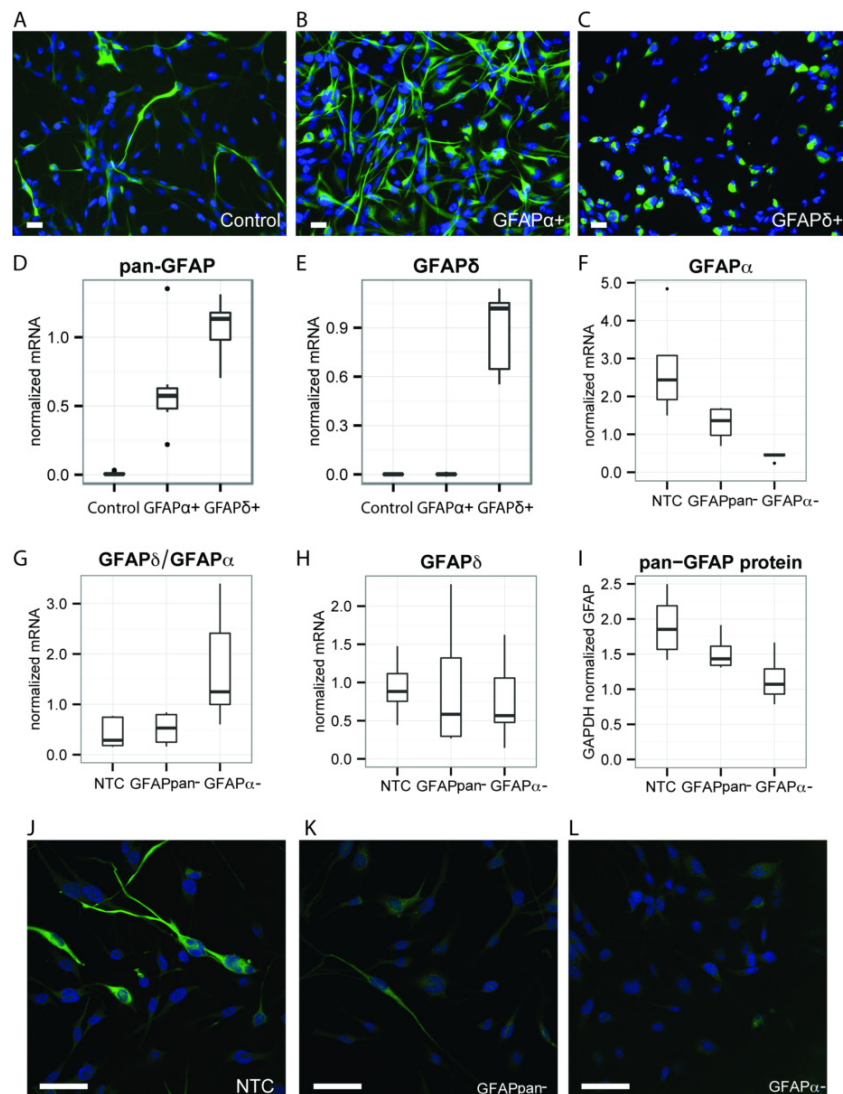

**Supplementary Figure 1: Modulation of GFAP-network in U251 astrocytoma cells.** To get insight into the function of these GFAP-isoforms in astrocytoma and to investigate a potential role for GFAP $\alpha$  and the GFAP $\delta/\alpha$  ratio in astrocytoma malignancy, we modulated GFAP-isoform expression in U251 cells by recombinant expression (A-E) or silencing with shRNAs (F-L) of the isoforms and analysed the GFAP-isoform induced transcriptomic changes. Cells were transduced with *GFAP $\alpha$*  (GFAP $\alpha^+$ ) or *GFAP $\delta$*  (GFAP $\delta^+$ ). Staining the control cells showed some cells positive for endogenous GFAP, but predominantly GFAP-negative cells (A) GFAP $\alpha^+$  cells showed a GFAP-network throughout the cytoplasm (B), whereas GFAP $\delta^+$  cells showed the characteristic juxtannuclear accumulation of GFAP (C), as we have described before [1]. At the RNA level, using primers that recognize all (pan) *GFAP*-isoforms, a significant increase of pan-*GFAP* expression in GFAP $\alpha^+$  (FC = 9.6, FDR < .001) and GFAP $\delta^+$  (FC = 16.3, FDR < .001) cells was observed (D). *GFAP $\delta$*  mRNA was only increased in GFAP $\delta^+$  cells (FC = 1534, FDR < .001) (E). Depicted is the median (horizontal line) with quartiles (box), N=8. These findings are in agreement with western blot results showing that the amount of GFAP protein is increased in these cell lines as shown before [1]. Cells were transduced with shRNA directed against pan-*GFAP* (GFAPpan $^-$ ) or against *GFAP $\alpha$*  (GFAP $\alpha^-$ ). Both the GFAPpan $^-$  (FC = 0.46, FDR = .063) and the GFAP $\alpha^-$  (FC = 0.15, FDR = .027) cells showed a decrease in *GFAP $\alpha$*  mRNA (F). GFAP $\alpha^-$  cells shifted their ratio of *GFAP $\delta/\alpha$*  mRNA more towards *GFAP $\delta$* , due to a strong decrease in *GFAP $\alpha$*  (ratio of *GFAP $\delta/\alpha$* : the ratio for NTC = 0.42; GFAPpan $^-$  = 0.51, FDR = .31; GFAP $\alpha^-$  = 1.73, FDR = .077) (G), while the *GFAP $\delta$*  was stable (H) N=5, depicted is the median (horizontal line) with quartiles (box)). The knockdown of GFAP was confirmed by western blot, and was more efficient in the GFAP $\alpha^-$  than in the GFAPpan $^-$  cells (I) depicted is median with quartiles (box), N=4. Stainings confirmed the less efficient knockdown of GFAP in the GFAPpan $^-$  (K) than the GFAP $\alpha^-$  (L), compared to NTC cells (J). Scale bars in the micrographs represent 50  $\mu$ m.

#### References

1. Moeton M, Stassen OM, Sluijs JA, van der Meer VW, Kluivers LJ, van Hoorn H, Schmidt T, Reits EA, van Strien ME, Hol EM. GFAP isoforms control intermediate filament network dynamics, cell morphology, and focal adhesions. *Cell Mol Life Sci.* 2016; 73:4101–4120. doi: 10.1007/s00018-016-2239-5.



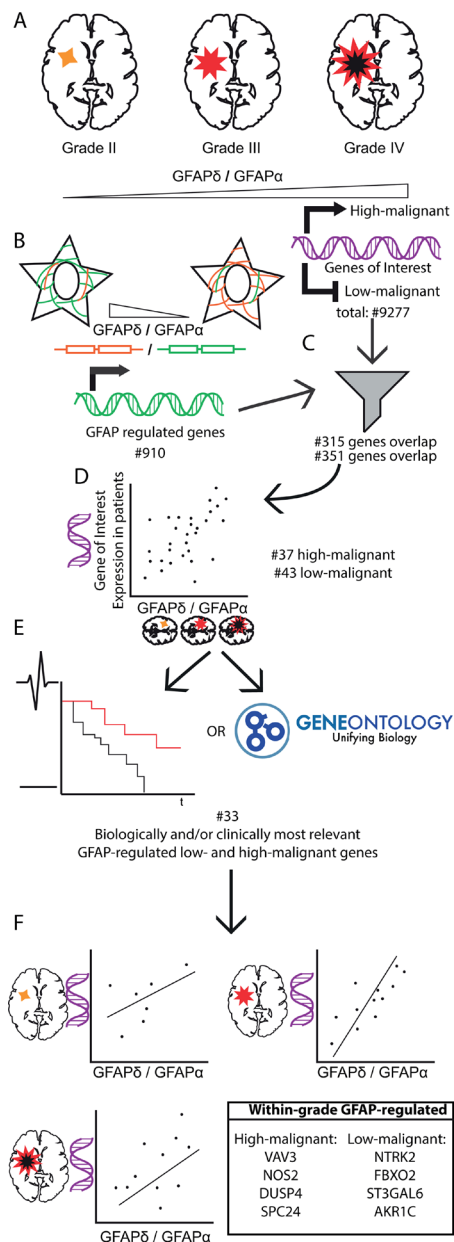

**Supplementary Figure 3: Processing steps of the data in this study.** After finding that *GFAP $\alpha$*  and *GFAP $\delta$ /GFAP $\alpha$*  ratio correlate with astrocytoma grade (Figure 1), all genes that were differentially expressed across astrocytoma grades in patients were identified from the TCGA database. **(A)** To select genes that are regulated by *GFAP $\alpha$*  and *GFAP $\delta$ /GFAP $\alpha$*  ratio, we modulated the *GFAP*-network in astrocytoma cell lines *in vitro* and identified differentially expressed genes regulated by *GFAP*. **(B)** The cell line dataset was used to filter the astrocytoma data. **(C)** From these combined patient/*in vitro* genes we calculated initial correlations between *GFAP*-isoforms/*GFAP*-ratio and target genes in the patient data and identified a set of *GFAP*-regulated high-malignant and low-malignant genes. These sets are *GFAP*-regulated based on their *in vitro* regulation by *GFAP*-isoforms. Gene sets are high-malignant or low-malignant based on their expression pattern in astrocytoma patients. **(D)** To identify the subset of genes relevant for astrocytoma progression and biology, the filtered genes were analyzed for survival, progression free survival, and gene ontology. **(E)** To further reduce the risk of confounding by astrocytoma grade, a linear regression was performed between the most interesting *GFAP*-regulated low- and high malignant genes and *GFAP* expression within the different astrocytoma grades. **(F)** Finally, 8 genes passed all these criteria and emerged as the most probable *GFAP*-regulated low- and high malignant genes with biological or clinical relevance in astrocytoma.

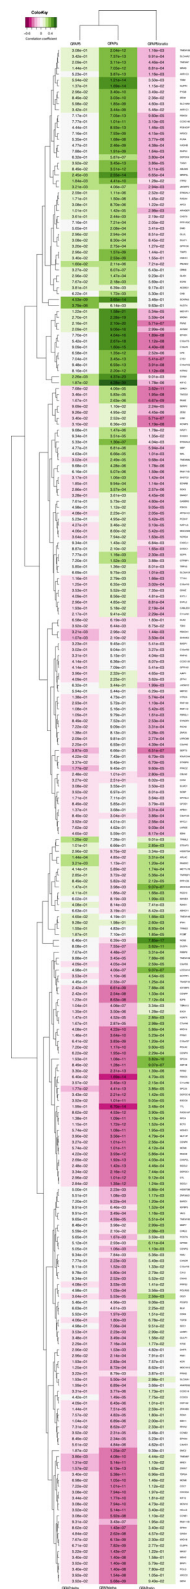

**Supplementary Figure 4: Heatmap of the genes that significantly correlated to either *GFAP $\alpha$*  or the *GFAP $\delta/\alpha$*  ratio (FDR < 0.01).** The color key indicates the correlation coefficient (R). Hierarchical clustering on the absolute correlation coefficient results into the identification of two main clusters. Cluster 1 consists of genes that positively correlate to *GFAP $\alpha$*  but negative to the *GFAP $\delta/\alpha$*  ratio, cluster 2 shows the opposite pattern with genes negatively correlating to *GFAP $\alpha$*  and positively to the *GFAP $\delta/\alpha$*  ratio.

Supplementary Table 1: Primer pairs used and their qPCR efficiencies for microarray validation

| Genename                                    | E-value        | Amplicon size | Sequence FW 5'-> 3'     | Sequence RV 5'-> 3'        |
|---------------------------------------------|----------------|---------------|-------------------------|----------------------------|
| ALU-SQ [1]                                  | 1.85           | variable      | CATGGTCAAACCCCGTCTCTA   | GCCTCAGCCTCCCGAGTAG        |
| ALU-J [2]                                   | 1.9            | variable      | CAACATAGTGAAACCCCGTCTCT | GCCTCAGCCTCCCGAGTAG        |
| LAMA1                                       | 1.98           | 120           | GTTTCGAACCTCCTCGCAGA    | CTGCCAGCACCATTGTTGAC       |
| BASP1                                       | 2              | 59            | GCTAACTCAGGGGCTGCATA    | TGAGCTTGCCTCCCATCTTG       |
| PI15                                        | 1.94           | 112           | GGCGACGTGCAGTTTACTTG    | CCCCATAACTTGGAGGACA        |
| OGDHL                                       | 2              | 120           | CTGGATCGTGGTCAACTGCT    | GGGTGCCTCAGCAGAGATTT       |
| A2M                                         | 2              | 83            | CTGAGTACAATGCTCCTTGCAG  | AACAGGACTCCAGCAAAGCA       |
| RAMP1                                       | 1.92           | 64            | CAGGGACGTGACCTTGACTTA   | TGGCTATGGGGTAAGCAGTC       |
| GFAPpan                                     | 2              | 50            | GCCACCTACAGGAAGCTGCT    | GGGAATGGTGATCCGGTTCT       |
| GFAP $\alpha$<br>(endogenous)               | 1.95           | 114           | CCCCTCTGCTTTGACTGAGC    | CCTTCTTCGGCCTTAGAGGG       |
| GFAP $\delta$<br>(endogenous & recombinant) | 1.92           | 96            | TCCAACCTGCAGATTCGAGG    | TTGGTATAACTCGTATTGTGAGGCTT |
| PPP3CB                                      | 2              | 116           | CTGCAGCCCGGAAAGAAATCA   | AGTCAGGCCCTTGAGTGTC        |
| CNOT10                                      | 1.9            | 110           | ACAGCAAGATCCAAAGCAGGA   | TGCAAGCAAGTATGGAGCAC       |
| CLNS1A                                      | 1.85           | 108           | AGTTGCTGGACAGTTTGAGGA   | AGAGTGGAAGAGGCACCAAG       |
| THNSL2                                      | 1.9            | 125           | TGGCAGTGAACCGCAATGAC    | CCTCTCCATGTTGTAGGGCAC      |
| LINGO2                                      | 2 <sup>a</sup> | 104           | CGAAGGAGAATTAACAGCGCC   | AACATGGATGCTCCAACTTCA      |
| SOX11                                       | 2              | 54            | TCCGGTTTGGGACTCCTAGT    | TGGCCGTCACGAAGCATTAT       |
| CRYAB                                       | 1.89           | 76            | TTCCCCACCAGTGAATGAAAG   | CTTGATAATTTGGGCCTGCC       |
| SERP2                                       | 1.95           | 96            | TGGCTAACGAGAAGCACAGC    | GCCATGGTCCCACAGGATATT      |
| SULF1                                       | 2              | 120           | CACTGTCCGAGTGACACACA    | TGCCTTATGGTCTTCCACG        |
| GAPDH                                       | 2              | 87            | TGCACCACCAACTGCTTAGC    | GGCATGGACTGTGGTCATGA       |
| GLUL                                        | 2              | 94            | TGTGTGGAAGAGTTGCCTGAG   | TGGCAGCAGGCACGAGATAC       |

E-value: Efficiency defined as fold increase of amplicon per qPCR cycle, <sup>a</sup>no product on calibration curve: 2 used for calculations, size: amplicon size in basepairs, FW:forward primer; RV: reverse primer.

#### REFERENCES

- Rihani A, Van Maerken T, Pattyn F, Van Peer G, Beckers A, De Brouwer S, Kumps C, Mets E, Van der Meulen J, Rondou P, Leonelli C, Mestdagh P, Speleman F, Vandesompele J. Effective Alu repeat based RT-Qpcr normalization in cancer cell perturbation experiments. PLoS One. 2013; 8:e71776. doi: 10.1371/journal.pone.0071776.
- Witt N, Rodger G, Vandesompele J, Benes V, Zumla A, Rook GA, Huggett JF. An assessment of air as a source of DNA contamination encountered when performing PCR. J Biomol Tech. 2009; 20:236–240.

Supplementary Table 2: Top Gene Ontology terms per domain overrepresented by GFAP $\alpha^+$  compared to control

| GO domain | GO.ID      | Term                                          | Annotated genes | Sig genes | p-val   |
|-----------|------------|-----------------------------------------------|-----------------|-----------|---------|
| BP        | GO:0090162 | establishment of epithelial cell polarity     | 11              | 2         | 8.6E-04 |
| BP        | GO:0030513 | positive regulation of BMP signalling pathway | 14              | 2         | 1.4E-03 |
| BP        | GO:0048706 | embryonic skeletal system development         | 79              | 4         | 2.9E-03 |
| BP        | GO:0003338 | metanephros morphogenesis                     | 17              | 2         | 4.0E-03 |
| BP        | GO:0002011 | morphogenesis of an epithelial sheet          | 24              | 2         | 4.2E-03 |
| BP        | GO:0007566 | embryo implantation                           | 29              | 2         | 6.1E-03 |
| BP        | GO:0007218 | neuropeptide signalling pathway               | 35              | 2         | 8.8E-03 |
| BP        | GO:0021762 | substantia nigra development                  | 38              | 2         | 1.0E-02 |
| BP        | GO:0008016 | regulation of heart contraction               | 83              | 3         | 1.1E-02 |
| BP        | GO:0030323 | respiratory tube development                  | 114             | 3         | 1.2E-02 |
| CC        | GO:0005887 | integral component of plasma membrane         | 600             | 9         | 4.8E-04 |
| CC        | GO:0005615 | extracellular space                           | 547             | 9         | 2.2E-03 |
| CC        | GO:0005576 | extracellular region                          | 2022            | 16        | 6.2E-03 |
| CC        | GO:0008180 | COP9 signalosome                              | 31              | 2         | 6.6E-03 |
| CC        | GO:0031012 | extracellular matrix                          | 225             | 3         | 1.0E-02 |
| CC        | GO:0005796 | Golgi lumen                                   | 39              | 2         | 1.0E-02 |
| CC        | GO:0072562 | blood microparticle                           | 59              | 2         | 2.3E-02 |
| MF        | GO:0030414 | peptidase inhibitor activity                  | 67              | 2         | 7.6E-03 |
| MF        | GO:0005507 | copper ion binding                            | 38              | 2         | 9.5E-03 |

Annotated genes = number of total microarray probes annotated to this term; Sig genes = number of probes detecting significant change in this term; p-val = parent-child weighted p-value of Fisher's exact test for overrepresentation; GO = Gene Ontology; BP = Biological Process; CC = Cellular Component; MF = Molecular Function.



Supplementary Table 3: Top Gene Ontology terms per domain overrepresented by GFAP $\delta^+$  compared to control

| GO domain | GO.ID      | Term                                                                                                                                                                 | Annotated genes | Sig genes | p-val   |
|-----------|------------|----------------------------------------------------------------------------------------------------------------------------------------------------------------------|-----------------|-----------|---------|
| BP        | GO:0030198 | extracellular matrix organization                                                                                                                                    | 241             | 17        | 6.3E-06 |
| BP        | GO:0016264 | gap junction assembly                                                                                                                                                | 5               | 3         | 1.2E-05 |
| BP        | GO:0007267 | cell-cell signalling                                                                                                                                                 | 619             | 25        | 3.1E-05 |
| BP        | GO:0072224 | metanephric glomerulus development                                                                                                                                   | 8               | 3         | 6.8E-05 |
| BP        | GO:0022617 | extracellular matrix disassembly                                                                                                                                     | 73              | 6         | 1.4E-04 |
| BP        | GO:0090162 | establishment of epithelial cell polarity                                                                                                                            | 11              | 3         | 1.9E-04 |
| BP        | GO:0033081 | regulation of T cell differentiation in thymus                                                                                                                       | 12              | 3         | 2.6E-04 |
| BP        | GO:0030539 | male genitalia development                                                                                                                                           | 13              | 3         | 3.3E-04 |
| BP        | GO:0007616 | long-term memory                                                                                                                                                     | 14              | 3         | 4.2E-04 |
| BP        | GO:0001666 | response to hypoxia                                                                                                                                                  | 172             | 7         | 4.8E-04 |
| CC        | GO:0005615 | extracellular space                                                                                                                                                  | 548             | 23        | 5.0E-06 |
| CC        | GO:0005887 | integral component of plasma membrane                                                                                                                                | 601             | 18        | 1.3E-04 |
| CC        | GO:0005886 | plasma membrane                                                                                                                                                      | 2364            | 57        | 2.6E-04 |
| CC        | GO:0072562 | blood microparticle                                                                                                                                                  | 59              | 5         | 5.1E-04 |
| CC        | GO:0030667 | secretory granule membrane                                                                                                                                           | 36              | 4         | 6.8E-04 |
| CC        | GO:0031095 | platelet dense tubular network membrane                                                                                                                              | 6               | 2         | 1.8E-03 |
| CC        | GO:0005922 | connexon complex                                                                                                                                                     | 6               | 2         | 1.8E-03 |
| CC        | GO:0031988 | membrane-bounded vesicle                                                                                                                                             | 1623            | 26        | 2.3E-03 |
| CC        | GO:0009897 | external side of plasma membrane                                                                                                                                     | 98              | 6         | 2.3E-03 |
| CC        | GO:0030054 | cell junction                                                                                                                                                        | 522             | 17        | 8.6E-03 |
| MF        | GO:0005021 | vascular endothelial growth factor-activated receptor activity                                                                                                       | 5               | 2         | 1.2E-03 |
| MF        | GO:0005243 | gap junction channel activity                                                                                                                                        | 7               | 2         | 2.4E-03 |
| MF        | GO:0051879 | Hsp90 protein binding                                                                                                                                                | 12              | 2         | 7.2E-03 |
| MF        | GO:0005246 | calcium channel regulator activity                                                                                                                                   | 13              | 2         | 8.5E-03 |
| MF        | GO:0017080 | sodium channel regulator activity                                                                                                                                    | 14              | 2         | 9.8E-03 |
| MF        | GO:0050839 | cell adhesion molecule binding                                                                                                                                       | 46              | 3         | 1.4E-02 |
| MF        | GO:0038023 | signalling receptor activity                                                                                                                                         | 439             | 13        | 1.4E-02 |
| MF        | GO:0016709 | oxidoreductase activity, acting on paired donors, with incorporation or reduction of molecular oxygen, NAD(P)H as one donor, and incorporation of one atom of oxygen | 19              | 2         | 1.8E-02 |
| MF        | GO:0015459 | potassium channel regulator activity                                                                                                                                 | 20              | 2         | 2.0E-02 |
| MF        | GO:0030414 | peptidase inhibitor activity                                                                                                                                         | 68              | 4         | 2.1E-02 |

Annotated genes = number of total microarray probes annotated to this term; Sig genes = number of probes detecting significant change in this term; p-val = parent-child weighted p-value of Fisher's exact test for overrepresentation; GO = Gene Ontology; BP = Biological Process; CC = Cellular Component; MF = Molecular Function.



Supplementary Table 4: Top Gene Ontology terms per domain overrepresented by GFAPpan<sup>+</sup> compared to NTC

| GO domain | GO.ID      | Term                                                            | Annotated genes | Sig genes | p-val   |
|-----------|------------|-----------------------------------------------------------------|-----------------|-----------|---------|
| BP        | GO:0090036 | regulation of protein kinase C signalling                       | 14              | 2         | 1.0E-03 |
| BP        | GO:0014910 | regulation of smooth muscle cell migration                      | 23              | 2         | 2.8E-03 |
| BP        | GO:0014068 | positive regulation of phosphatidylinositol 3-kinase signalling | 35              | 2         | 6.5E-03 |
| BP        | GO:0048146 | positive regulation of fibroblast proliferation                 | 36              | 2         | 6.9E-03 |
| BP        | GO:0045740 | positive regulation of DNA replication                          | 45              | 2         | 1.1E-02 |
| BP        | GO:0016192 | vesicle-mediated transport                                      | 821             | 6         | 1.2E-02 |
| CC        | GO:0005902 | microvillus                                                     | 48              | 2         | 1.1E-02 |
| CC        | GO:0016021 | integral component of membrane                                  | 3172            | 17        | 3.2E-02 |
| CC        | GO:0005576 | extracellular region                                            | 2262            | 14        | 3.4E-02 |
| MF        | GO:0004177 | aminopeptidase activity                                         | 29              | 2         | 4.1E-03 |

Annotated genes = number of total microarray probes annotated to this term; Sig genes = number of probes detecting significant change in this term; p-val = parent-child weighted p-value of Fisher's exact test for overrepresentation; GO = Gene Ontology; BP = Biological Process; CC = Cellular Component; MF = Molecular Function.

Supplementary Table 5: Top Gene Ontology terms per domain overrepresented by GFAP $\alpha$  compared to NTC

| GO domain | GO.ID      | Term                                                 | Annotated genes | Sig genes | p-val   |
|-----------|------------|------------------------------------------------------|-----------------|-----------|---------|
| BP        | GO:0001525 | angiogenesis                                         | 273             | 42        | 2.4E-07 |
| BP        | GO:0030198 | extracellular matrix organization                    | 276             | 41        | 1.5E-06 |
| BP        | GO:0007399 | nervous system development                           | 1432            | 131       | 8.2E-06 |
| BP        | GO:0043406 | positive regulation of MAP kinase activity           | 150             | 15        | 2.2E-05 |
| BP        | GO:0050679 | positive regulation of epithelial cell proliferation | 105             | 17        | 1.1E-04 |
| BP        | GO:0048102 | autophagic cell death                                | 6               | 4         | 1.2E-04 |
| BP        | GO:0001570 | vasculogenesis                                       | 53              | 11        | 1.6E-04 |
| BP        | GO:0007155 | cell adhesion                                        | 661             | 73        | 2.5E-04 |
| BP        | GO:0008406 | gonad development                                    | 145             | 25        | 2.5E-04 |
| BP        | GO:0060445 | branching involved in salivary gland morphogenesis   | 19              | 8         | 2.7E-04 |
| CC        | GO:0005886 | plasma membrane                                      | 2713            | 222       | 1.8E-05 |
| CC        | GO:0005604 | basement membrane                                    | 73              | 14        | 3.4E-05 |
| CC        | GO:0005887 | integral component of plasma membrane                | 708             | 67        | 4.4E-05 |
| CC        | GO:0042383 | sarcolemma                                           | 68              | 14        | 3.0E-04 |
| CC        | GO:0016021 | integral component of membrane                       | 3219            | 231       | 5.3E-04 |
| CC        | GO:0005615 | extracellular space                                  | 637             | 57        | 5.6E-04 |
| CC        | GO:0043679 | axon terminus                                        | 48              | 8         | 1.2E-03 |
| CC        | GO:0009986 | cell surface                                         | 332             | 33        | 1.5E-03 |
| CC        | GO:0031012 | extracellular matrix                                 | 269             | 42        | 1.7E-03 |
| CC        | GO:0042995 | cell projection                                      | 1021            | 69        | 2.6E-03 |
| MF        | GO:0016595 | glutamate binding                                    | 7               | 4         | 2.7E-04 |
| MF        | GO:0008201 | heparin binding                                      | 89              | 14        | 3.0E-04 |
| MF        | GO:0050840 | extracellular matrix binding                         | 36              | 8         | 8.9E-04 |
| MF        | GO:0042813 | Wnt-activated receptor activity                      | 16              | 5         | 1.3E-03 |
| MF        | GO:0000293 | ferric-chelate reductase activity                    | 5               | 3         | 1.5E-03 |
| MF        | GO:0004954 | prostanoid receptor activity                         | 5               | 3         | 1.5E-03 |
| MF        | GO:0005007 | fibroblast growth factor-activated receptor activity | 5               | 3         | 1.5E-03 |
| MF        | GO:0001968 | fibronectin binding                                  | 17              | 5         | 1.7E-03 |
| MF        | GO:0005178 | integrin binding                                     | 64              | 10        | 2.3E-03 |
| MF        | GO:0008022 | protein C-terminus binding                           | 146             | 17        | 2.5E-03 |

Annotated genes = number of total microarray probes annotated to this term; Sig genes = number of probes detecting significant change in this term; p-val = parent-child weighted p-value of Fisher's exact test for overrepresentation; GO = Gene Ontology; BP = Biological Process; CC = Cellular Component; MF = Molecular Function.

Supplementary Table 6: Top Gene Ontology terms per domain overrepresented by comparing GFAP $\alpha^+$  to GFAP $\delta^+$ 

| GO category | GO.ID      | Term                                                             | Annotated genes | Significant genes | p-val   |
|-------------|------------|------------------------------------------------------------------|-----------------|-------------------|---------|
| BP          | GO:0001525 | angiogenesis                                                     | 251             | 7                 | 1.8E-04 |
| BP          | GO:0060291 | long-term synaptic potentiation                                  | 20              | 3                 | 2.0E-04 |
| BP          | GO:0016264 | gap junction assembly                                            | 5               | 2                 | 3.3E-04 |
| BP          | GO:0030198 | extracellular matrix organization                                | 242             | 8                 | 3.7E-04 |
| BP          | GO:0045109 | intermediate filament organization                               | 7               | 2                 | 6.9E-04 |
| BP          | GO:2000378 | negative regulation of reactive oxygen species metabolic process | 10              | 2                 | 1.5E-03 |
| BP          | GO:0007616 | long-term memory                                                 | 14              | 2                 | 2.9E-03 |
| BP          | GO:0051965 | positive regulation of synapse assembly                          | 16              | 2                 | 3.8E-03 |
| BP          | GO:0048662 | negative regulation of smooth muscle cell proliferation          | 16              | 2                 | 3.8E-03 |
| BP          | GO:0007612 | learning                                                         | 64              | 3                 | 6.1E-03 |
| CC          | GO:0005615 | extracellular space                                              | 548             | 14                | 6.3E-05 |
| CC          | GO:0031988 | membrane-bounded vesicle                                         | 1623            | 11                | 6.8E-04 |
| CC          | GO:0072562 | blood microparticle                                              | 59              | 3                 | 4.7E-03 |
| CC          | GO:0043195 | terminal bouton                                                  | 24              | 2                 | 8.3E-03 |
| CC          | GO:0005886 | plasma membrane                                                  | 2366            | 26                | 1.7E-02 |
| CC          | GO:0005576 | extracellular region                                             | 2023            | 26                | 1.9E-02 |
| CC          | GO:0009986 | cell surface                                                     | 283             | 5                 | 2.1E-02 |
| CC          | GO:0005887 | integral component of plasma membrane                            | 602             | 8                 | 2.2E-02 |
| CC          | GO:0005882 | intermediate filament                                            | 87              | 3                 | 2.9E-02 |
| MF          | GO:0008201 | heparin binding                                                  | 73              | 3                 | 8.4E-03 |
| MF          | GO:0005125 | cytokine activity                                                | 80              | 3                 | 1.1E-02 |
| MF          | GO:0043169 | cation binding                                                   | 2757            | 18                | 1.4E-02 |
| MF          | GO:0030170 | pyridoxal phosphate binding                                      | 39              | 2                 | 2.1E-02 |

Annotated genes = Number of total microarray probes annotated to this term; Sig genes = number of probes detecting significant change in this term; p-val = parent-child weighted p-value of Fisher's exact test for overrepresentation; GO = Gene Ontology; BP = Biological Process; CC = Cellular Component; MF = Molecular Function.

**Supplementary Table 7: Linear regression results of the 43 identified low-malignant genes and 37 identified high-malignant genes**

See Supplementary File 1.

**Supplementary Table 8: Kaplan Meier survival analysis of GFAP-regulated high- and low-malignant genes in grade III astrocytoma patients**

| Gene Name | p-value  | FDR      | HM/LM | Direction of expression and survival probability |
|-----------|----------|----------|-------|--------------------------------------------------|
| DUSP4     | 4.13E-07 | 3.30E-05 | HM    | high expression, lower survival probability      |
| VAV3      | 1.35E-06 | 5.40E-05 | HM    | high expression, lower survival probability      |
| E2F8      | 1.46E-05 | 3.51E-04 | HM    | high expression, lower survival probability      |
| ZDHHC23   | 1.76E-05 | 3.51E-04 | HM    | high expression, lower survival probability      |
| MANEA     | 2.00E-04 | 3.20E-03 | HM    | high expression, lower survival probability      |
| AKR1C3    | 2.83E-04 | 3.78E-03 | LM    | low expression, lower survival probability       |
| HADHB     | 1.22E-03 | 9.69E-03 | LM    | low expression, lower survival probability       |
| SMAD7     | 1.19E-03 | 9.69E-03 | LM    | low expression, lower survival probability       |
| TMEM59L   | 1.06E-03 | 9.69E-03 | LM    | low expression, lower survival probability       |
| ECT2      | 1.33E-03 | 9.69E-03 | HM    | high expression, lower survival probability      |
| IGF2BP3   | 1.21E-03 | 9.69E-03 | HM    | high expression, lower survival probability      |
| C14orf132 | 1.88E-03 | 1.03E-02 | LM    | low expression, lower survival probability       |
| BARD1     | 1.66E-03 | 1.03E-02 | HM    | high expression, lower survival probability      |
| HS3ST3B1  | 1.84E-03 | 1.03E-02 | HM    | high expression, lower survival probability      |
| TTL       | 1.93E-03 | 1.03E-02 | HM    | high expression, lower survival probability      |
| ODZ1      | 2.25E-03 | 1.13E-02 | HM    | high expression, lower survival probability      |
| ARHGEF10L | 2.89E-03 | 1.36E-02 | LM    | low expression, lower survival probability       |
| ST3GAL6   | 4.55E-03 | 1.82E-02 | LM    | low expression, lower survival probability       |
| C7orf46   | 4.44E-03 | 1.82E-02 | HM    | high expression, lower survival probability      |
| TMEM158   | 4.17E-03 | 1.82E-02 | HM    | high expression, lower survival probability      |
| CYS1      | 6.18E-03 | 2.36E-02 | LM    | low expression, lower survival probability       |
| C10orf75  | 6.68E-03 | 2.43E-02 | LM    | low expression, lower survival probability       |
| CXADR     | 8.95E-03 | 3.11E-02 | HM    | high expression, lower survival probability      |
| LOC541471 | 1.06E-02 | 3.52E-02 | HM    | high expression, lower survival probability      |
| TMEM182   | 1.26E-02 | 4.03E-02 | HM    | high expression, lower survival probability      |
| C5orf35   | 1.32E-02 | 4.06E-02 | HM    | high expression, lower survival probability      |
| PDGFD     | 1.44E-02 | 4.27E-02 | HM    | high expression, lower survival probability      |
| SPC24     | 1.52E-02 | 4.34E-02 | HM    | high expression, lower survival probability      |
| GTPBP1    | 1.61E-02 | 4.35E-02 | LM    | low expression, lower survival probability       |
| GPR39     | 1.63E-02 | 4.35E-02 | HM    | high expression, lower survival probability      |
| RBBP8     | 1.87E-02 | 4.82E-02 | HM    | high expression, lower survival probability      |
| POSTN     | 1.97E-02 | 4.93E-02 | HM    | high expression, lower survival probability      |

Results of log rank regression analysis of survival estimates of below and above median expression of genes of interest. FDR = False Discovery Rate controlled p-value, LM = low-malignant, HM = high-malignant, Direction of expression and survival probability = indication whether low or high expression of the gene of interest results in a lower survival probability for grade III astrocytoma patients.

**Supplementary Table 9: Linear regression results of final set of GFAP-regulated high- and low-malignant genes**

See Supplementary File 2.
